# Supplementary material
Source: PubMed Central journal article supplement (PMC4370190)
Supplement: NIHMS592778-supplement-1.pdf [file NIHMS592778-supplement-1.pdf]

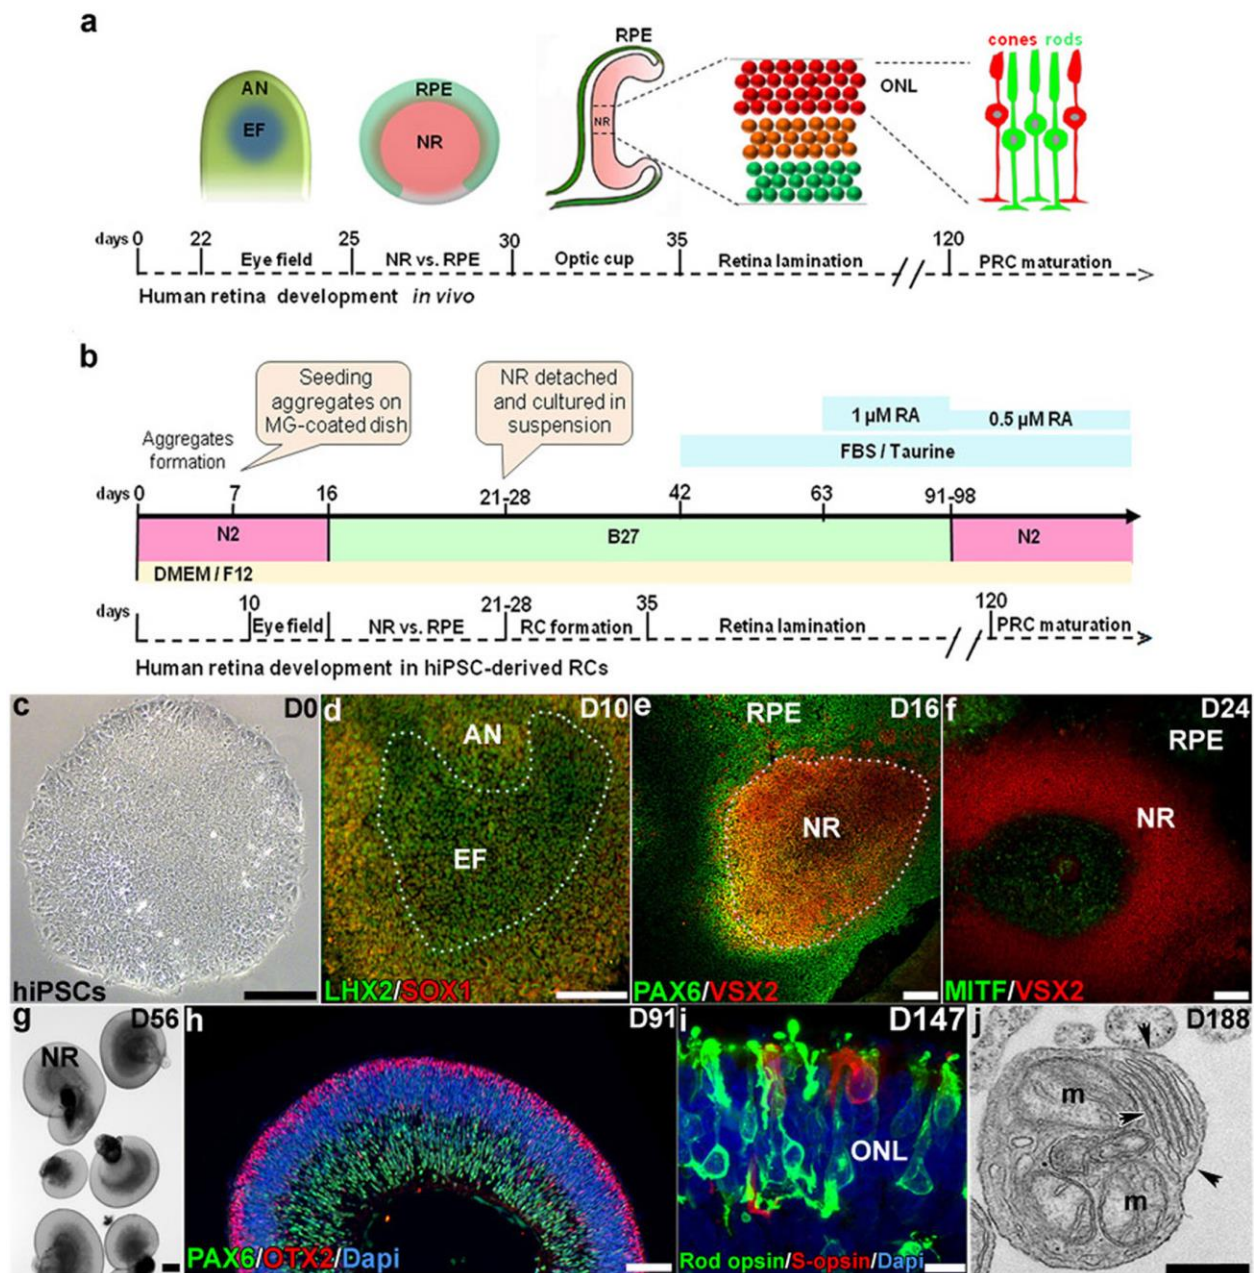

**Supplementary Figure 1. Retinogenesis during human embryonic development and in 3-D retinal cups (RCs) derived from hiPSC.** **a**, Main steps leading to the formation of the human retina *in vivo*. **b**, Diagram of the optimized culture conditions used for inducing hiPSC to recapitulate retinogenesis *in vitro*. **c-j**, Main steps of RC development *in vitro*: hiPSC (**c**) differentiated into retinal progenitors that self-organized into eye field-like domains (EF; **d**; AN: anterior neuroepithelium) which subsequently differentiated into a central neural retina (NR) domain and a peripheral retinal pigment epithelium (RPE) domain (**e**). As differentiation progressed, the NR domain acquired an optic-cup-like shape (**f**) and formed a 3-D RC when cultured in suspension (**g**). Over time, RCs acquired the characteristic retinal lamination (**h**), including a well-organized outer nuclear layer (ONL) containing highly mature rod and cone photoreceptors showing expression of the corresponding opsins (**i**) and formation of outer-segment discs (demarcated by arrowheads; **j**; m: mitochondrion). Scale bars: 200 $\mu$ m (**c** and **g**); 100 $\mu$ m (**d-f** and **h**); 20 $\mu$ m (**i**); 0.5 $\mu$ m (**j**).

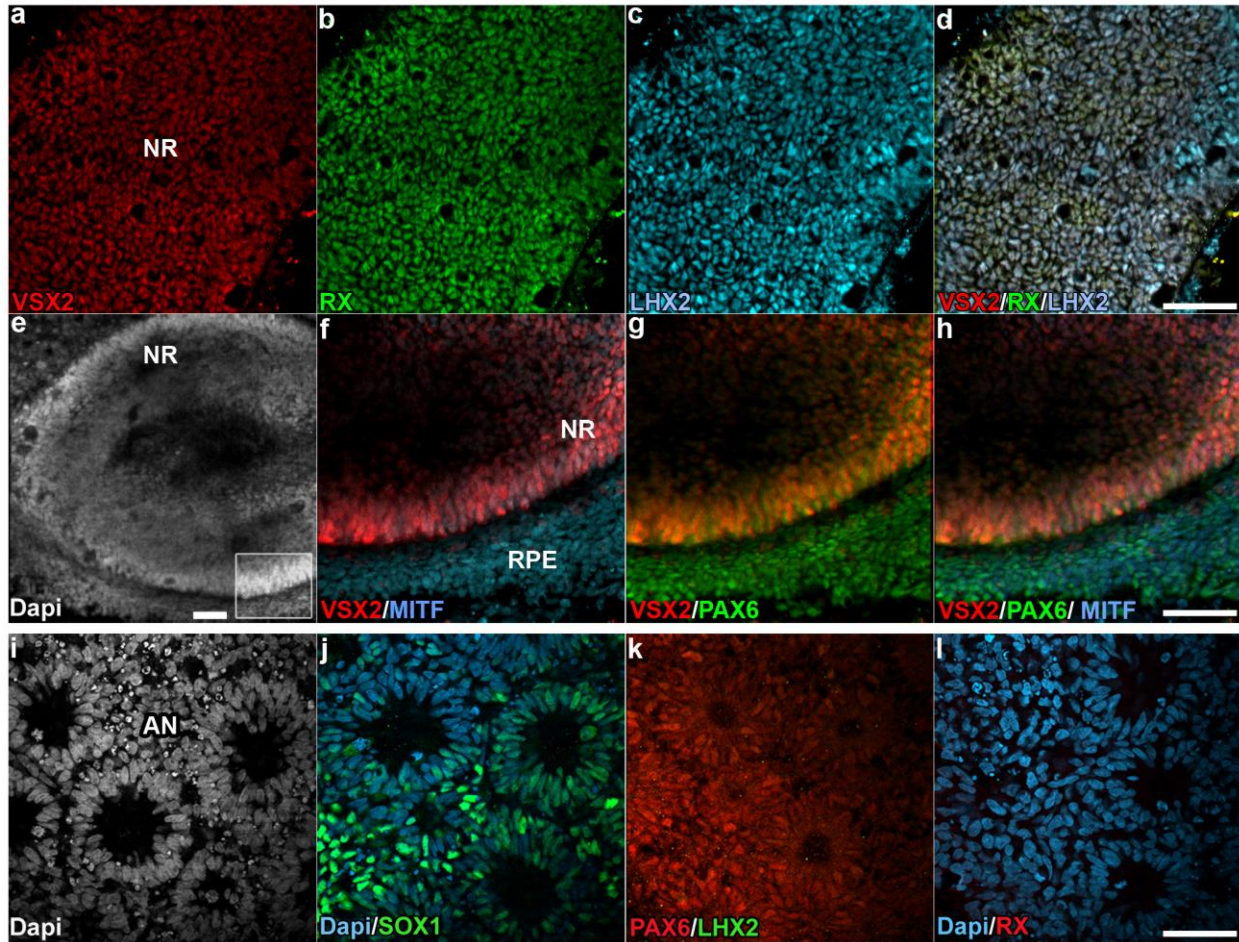

**Supplementary Figure 2. Coexisting cellular domains in D16 to D28 cultures.** Cell differentiation in these cultures is not synchronized; therefore, in a given culture dish, early neural retina (NR) domains (a-d), optic-cup-like NR and surrounding retinal pigment epithelium (RPE) domains (e-h) and anterior neuroepithelial (AN) cells forming characteristic rosettes (i-l) were found simultaneously. Scale bars: 50µm.



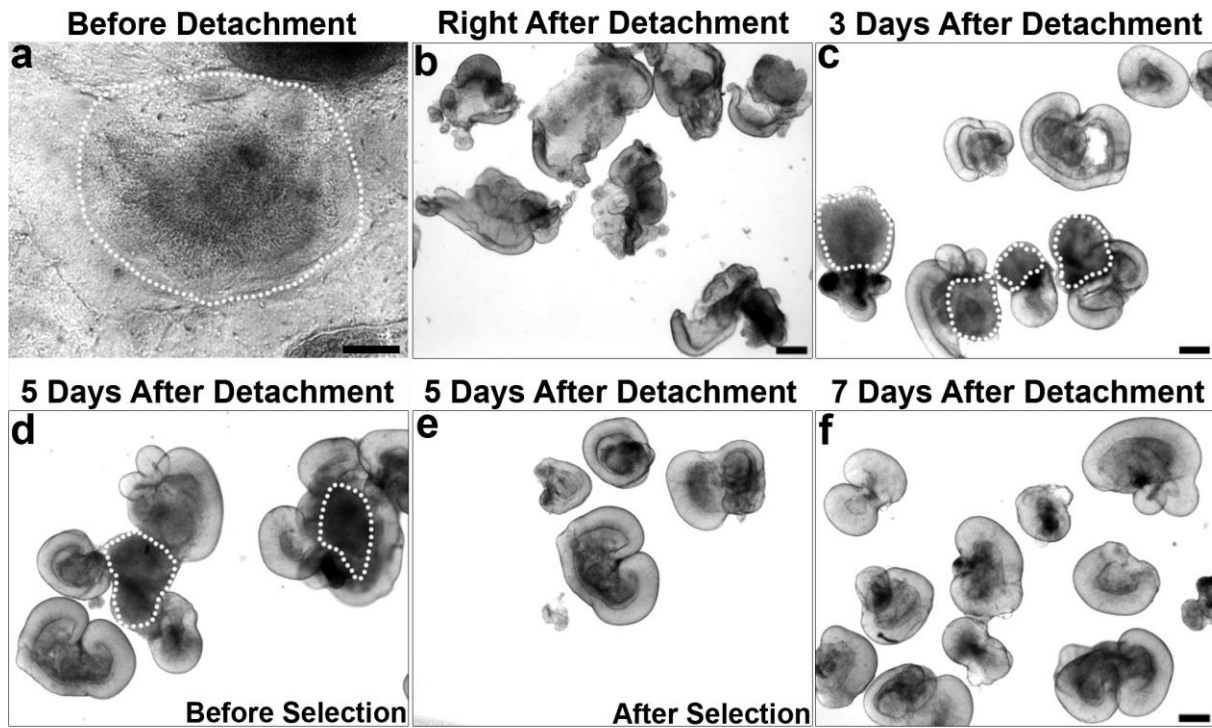

**Supplementary Figure 3. Progressive formation of 3-D retinal cups (RCs) from detached neural retina (NR) domains.** **a**, a NR domain from a D26 culture before detachment. **b**, several NR domains right after being manually detached and switched to culture in suspension. **c-f**, under suspension culture, neural retinal epithelia within the detached NR domains increased in size and thickness and formed RCs. Some RCs grew attached to non-retinal cellular aggregates (demarcated by dashed lines in c and d) which appeared darker and disorganized. For long-term culture, RCs were separated from non-retinal cellular aggregates (e,f). Scale bar: 100µm

**k**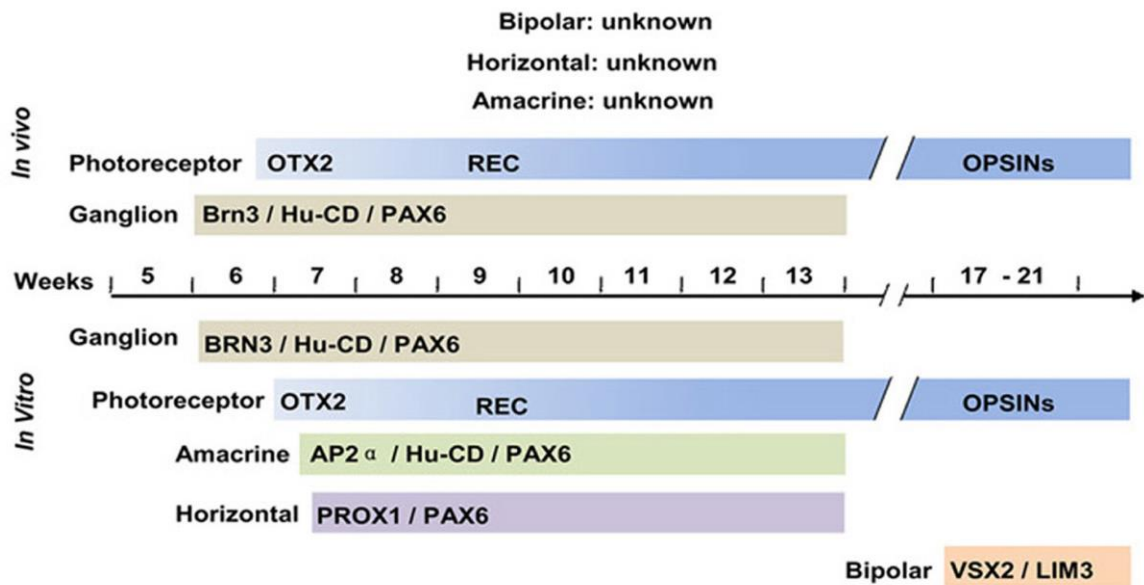

**Supplementary Figure 4. Timeline of retinal neurogenesis in 3-D RCs *in vitro* compared to *in vivo* human retina.** The genesis of the different retinal neuronal precursors in our 3-D RCs followed the sequential pattern characteristic of the vertebrate retina<sup>41,42</sup>. The timing of appearance of ganglion and photoreceptor precursors as well as the onset of expression of their cell-type-specific proteins coincided with that observed in the human embryonic retina<sup>44,47,48,69,70</sup>. The specific timing of amacrine, horizontal and bipolar cell differentiation in the developing human retina is still unknown.

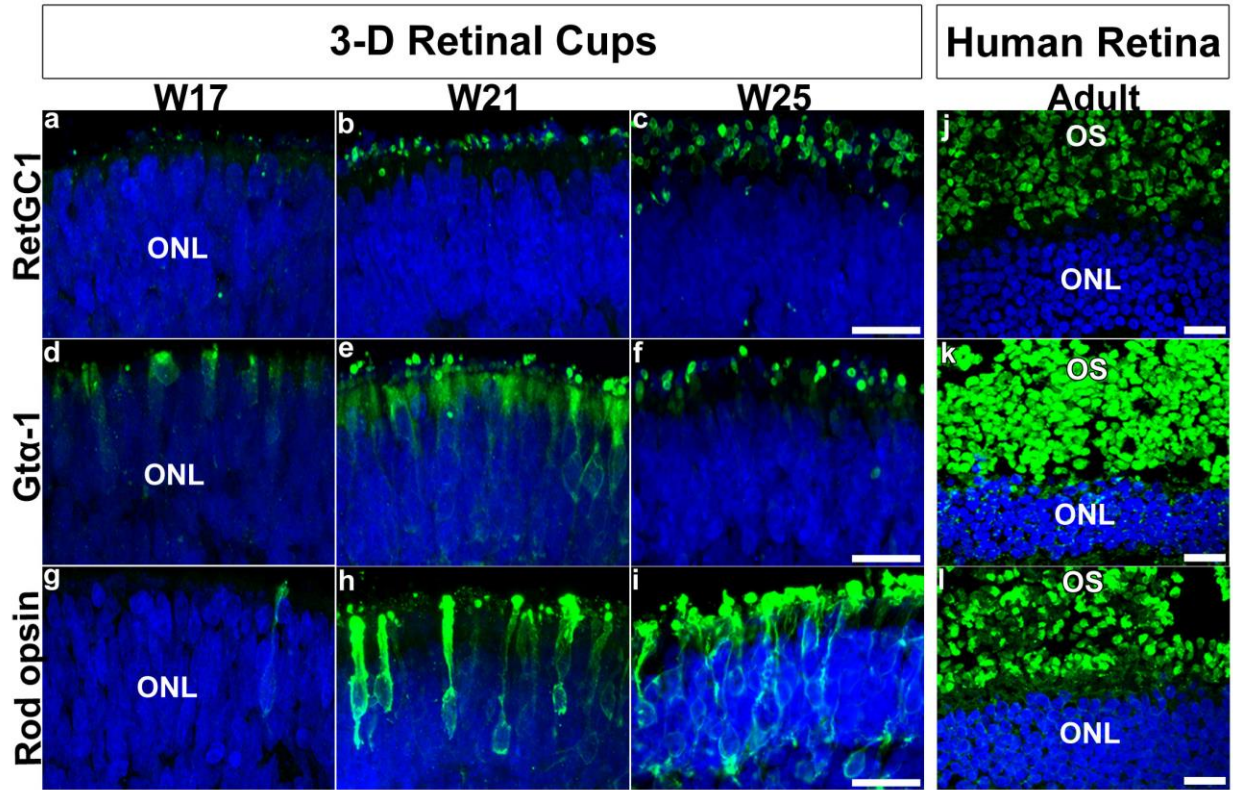

**Supplementary Figure 5. hiPSC-derived photoreceptors within the retinal cups (RCs) gradually acquired expression of proteins involved in phototransduction. a-i,** As observed in the developing human retina *in vivo*<sup>44</sup>, expression of the phototransduction proteins increased in parallel to that of rod opsin. **j-l,** Antibodies used for detecting proteins associated with the phototransduction pathway in the RCs were validated in adult human retina as shown in these examples. Scale bars: 20 $\mu$ m.

**Supplementary Table 1. Human iPSC lines used in this study.**

| <b>Cell Line</b>  | <b>Cell of Origin</b>                                          | <b>Reprogramming Method</b>                                                                                  | <b>Genomic Integration</b> | <b>Ref</b> |
|-------------------|----------------------------------------------------------------|--------------------------------------------------------------------------------------------------------------|----------------------------|------------|
| <b>CB-iPSC6.2</b> | Human CD34 <sup>+</sup> cord blood-derived myeloid progenitors | non-viral 7-factor episomes (SOX2, OCT4, KLF4, MYC, NANOG, LIN28, SV40T) with BMSC-priming of myeloid donors | NO                         | 38         |
| <b>KA.1</b>       | Human adult keratinocytes                                      | non-viral 7-factor episomes (SOX2, OCT4, KLF4, MYC, NANOG, LIN28, SV40T)                                     | NO                         | 39,66      |
| <b>IMR90-4</b>    | Human fibroblast cell line IMR90                               | Lentiviral 4 factors (SOX2, OCT4, NANOG, LIN28)                                                              | YES                        | 37         |

Three representative human iPSC lines of different cell origin and reprogramming method were chosen to test the reproducibility of our method across cell lines.
